# Supplementary material for: Using droplet digital PCR to analyze MYCN and ALK copy number in plasma from patients with neuroblastoma
Source: PubMed Central journal article supplement (PMC5689606; doi:10.18632/oncotarget.19076), 2017-07-07
Supplement: oncotarget-08-85234-s001.pdf [file oncotarget-08-85234-s001.pdf]

## Using droplet digital PCR to analyze *MYCN* and *ALK* copy number in plasma from patients with neuroblastoma

### SUPPLEMENTARY MATERIALS

#### MATERIALS AND METHODS

##### Cell culture

CLB-GA and TR14 were maintained in Dulbecco's modified Eagle medium (DMEM, Gibco, Paisley, UK) supplemented with 10% fetal calf serum (FCS, Biochrom, Berlin, Germany). BE(2)-C, IMR-32, SH-SY5Y and SK-N-AS were cultured in DMEM supplemented with 10% FCS and 1% non-essential amino acids (NEAA, Lonza, Cologne, Germany). SK-N-DZ were maintained in DMEM supplemented with 10% FCS and 1% L-glutamine

(Gibco). LAN-6 were cultured in DMEM supplemented with only 20% FCS. COLO-320, LAN-5, NBL-S and SK-N-FI were maintained in Roswell Park Memorial Institute (RPMI) 1640 medium (Gibco) supplemented only with 10% FCS, and 1% NEAA was also added for the culture of HD-MB03, Kelly, NB-1 and SH-EP. IMR-5 was cultured in RPMI 1640 supplemented with 10% FCS, 1% NEAA and 1% L-glutamine. The OHC-NB1 cell line was grown in DMEM supplemented with 10% FCS, 1% NEAA, 20 ng/ml EGF (Promocell, Heidelberg, Germany) and 20 ng/ml bFGF (Promocell).

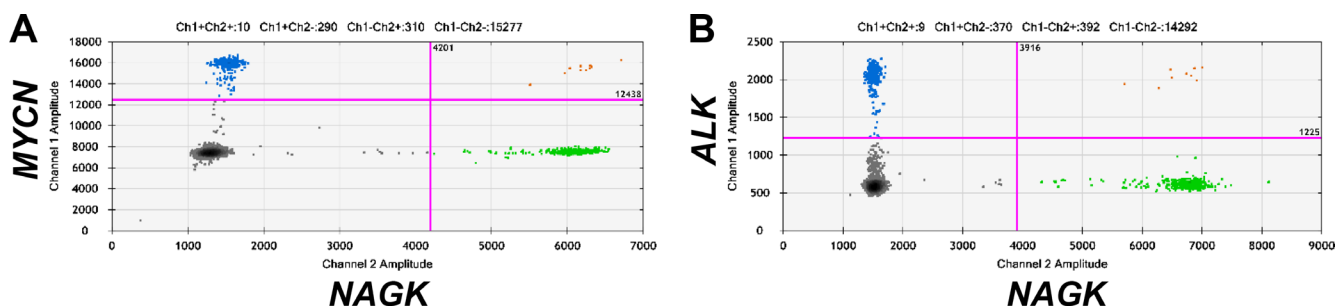

**Supplementary Figure 1: Exemplary 2-D plots of droplet fluorescence in the ddPCR duplex reactions using gDNA of SK-N-AS cells as a template.** Channel 1 fluorescence (FAM) is plotted against channel 2 fluorescence (HEX) for each droplet in the ddPCR duplex reactions for *MYCN/NAGK* (A) or *ALK/NAGK* (B). Red lines indicate thresholds for positivity in both channels.

**Supplementary Table 1: Primers and probes used in ddPCR**

| <b>Primer/Probe</b> | <b>Sequence (5'-3')</b>             |
|---------------------|-------------------------------------|
| MYCN forward        | GTGCTCTCCAATTCTCGCCT                |
| MYCN reverse        | GATGGCCTAGAGGAGGGCT                 |
| MYCN probe          | FAM-CACTAAAGTTCCTTCCACCCTCTCCT-BHQ1 |
| NAGK forward        | TGGGCAGACACATCGTAGCA                |
| NAGK reverse        | CACCTTCACTCCCACCTCAAC               |
| NAGK probe          | HEX-TGTTGCCCCGAGATTGACCCGGT-BHQ1    |
| ALK forward         | AGATGGACTTGCTGGATGGG                |
| ALK reverse         | GCAGCCTCTCCCTTACCTC                 |
| ALK probe           | FAM-GGCAGAGCGTTCTAAGGAGA-BHQ1       |
